# Supplementary material
Source: PubMed Central journal article supplement (PMC2938138)
Supplement: pp.110.159723_1.pdf [file pp.110.159723_1.pdf]

***A. tumefaciens*(*pcyaA-ha*) / *N. tabacum* cv. Xanthi**

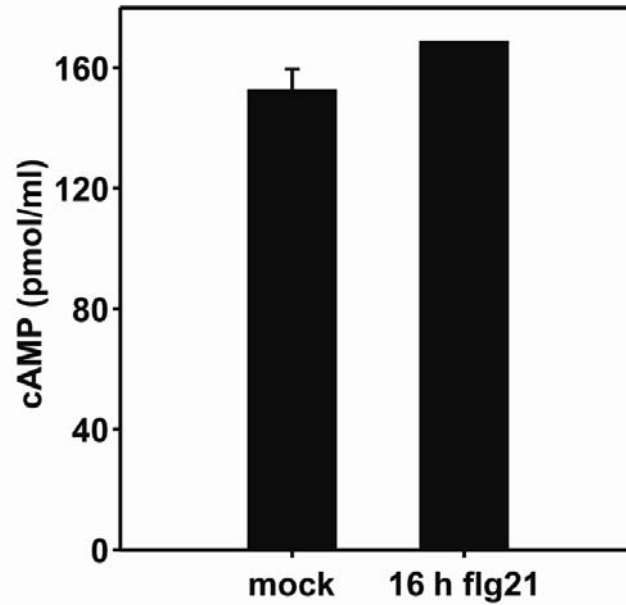

**Supplemental Figure 1.** CyaA remains functional in PTI-induced tissue. *N. tabacum* cv. Xanthi leaves that were infiltrated with *A. tumefaciens* transiently expressing *cyaA-ha*. 24 h post infiltration the leaves were infiltrated again with either water (mock) or a 1  $\mu$ M flg21 solution. Samples were taken 16 h after the second infiltration and a CyaA assay was performed to measure cAMP levels. This experiments were repeated three times with similar results.

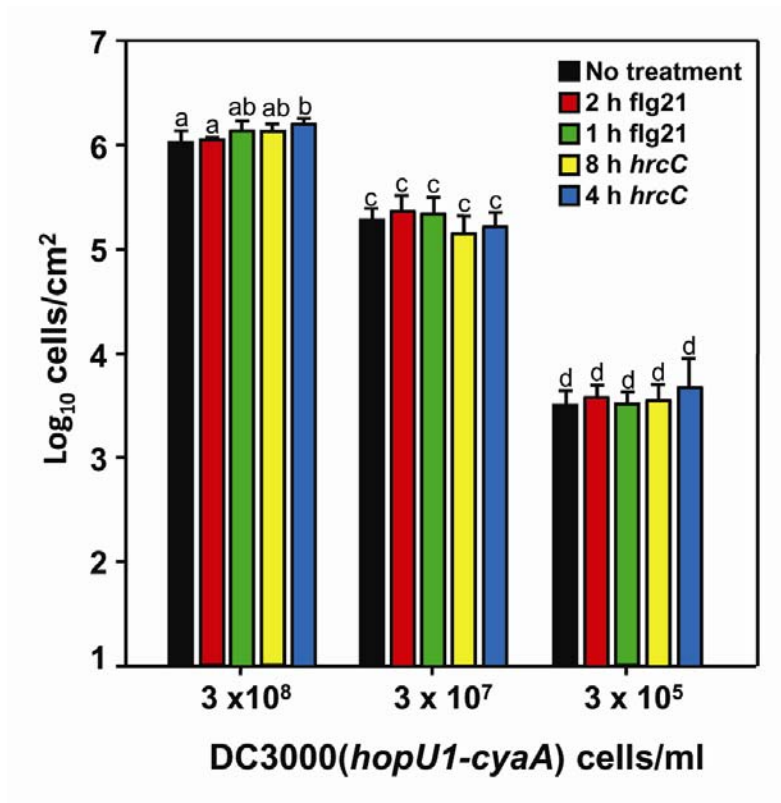

**Supplemental Figure 2.** Growth of DC3000(*phopU1-cyaA*) was not affected by pre-treatment with either flg21 or *hrcC*. DC3000(*phopU1-cyaA*) was infiltrated into tobacco at 3 x 10<sup>8</sup>, 3 x 10<sup>7</sup>, or 3 x 10<sup>5</sup> cells/ml either alone, 1 or 2 h after 1 μM flg21 infiltration, or 4 or 8 h after infiltration of 3 x 10<sup>8</sup> cells/ml of *hrcC*. Bacteria were enumerated in the overlapping area 7 h after DC3000(*phopU1-cyaA*) infiltration. PTI-induction does not alter the growth of DC3000(*phopU1-cyaA*) in tobacco within 7 h. These experiments were repeated three times with similar results and standard error bars are shown.

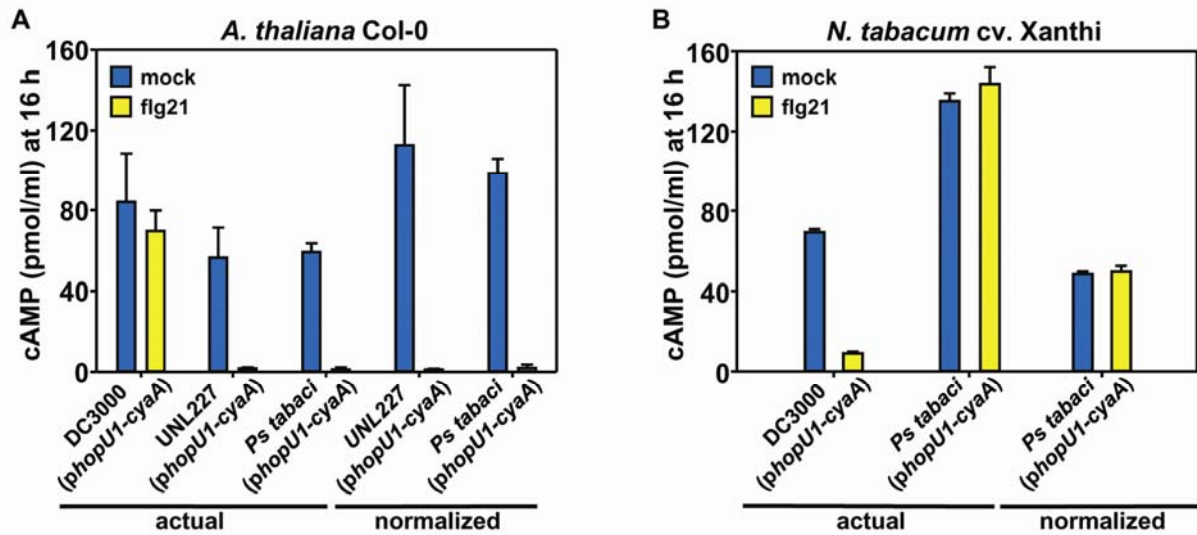

**Supplemental Figure 3.** The growth of DC3000(*phopU1-cyaA*), UNL227(*phopU1-cyaA*), and *P. syringae* pv. *tabaci*(*phopU1-cyaA*) was determined at 0 and 16 h after infiltration in *A. thaliana* Col-0 or *N. tabacum* cv. Xanthi leaves pretreated for 2 h with 1  $\mu$ M flg21 or water (mock). The levels of cAMP were determined at 16 h in *A. thaliana* Col-0 (A) and *N. tabacum* cv. Xanthi (B) plant tissue. The cAMP levels were normalized with respect to the differences in growth between DC3000 and the other strains. The cAMP amounts are shown before (actual) and after normalization (normalized). While there were significant changes in cAMP levels in UNL227(*phopU1-cyaA*) and *P. syringae* pv. *tabaci*(*phopU1-CyaA*) after normalization, there was little change in the differences in cAMP amounts between flg21-induced and mock samples. Therefore, the growth differences between the *P. syringae* strains are not responsible for the dramatic differences in cAMP levels that occur after PTI induction. These experiments were repeated twice with similar results and standard error bars are shown.

***A. tumefaciens* +**

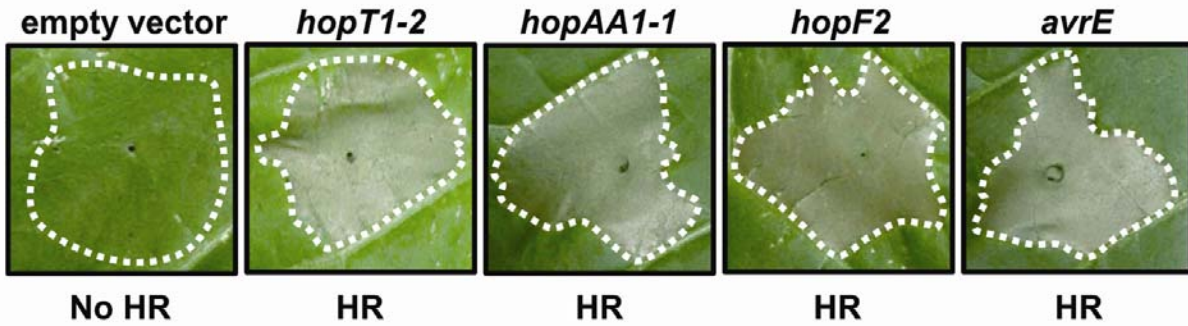

**Supplemental Figure 4.** Tobacco leaves were infiltrated with *Agrobacterium* carrying binary constructs containing each of the indicated T3E genes. After 24-48 h HR-like responses developed within the infiltrated zone for these T3E genes suggesting that they encode T3Es that induce ETI. Pictures were taken 48 h after infiltration.

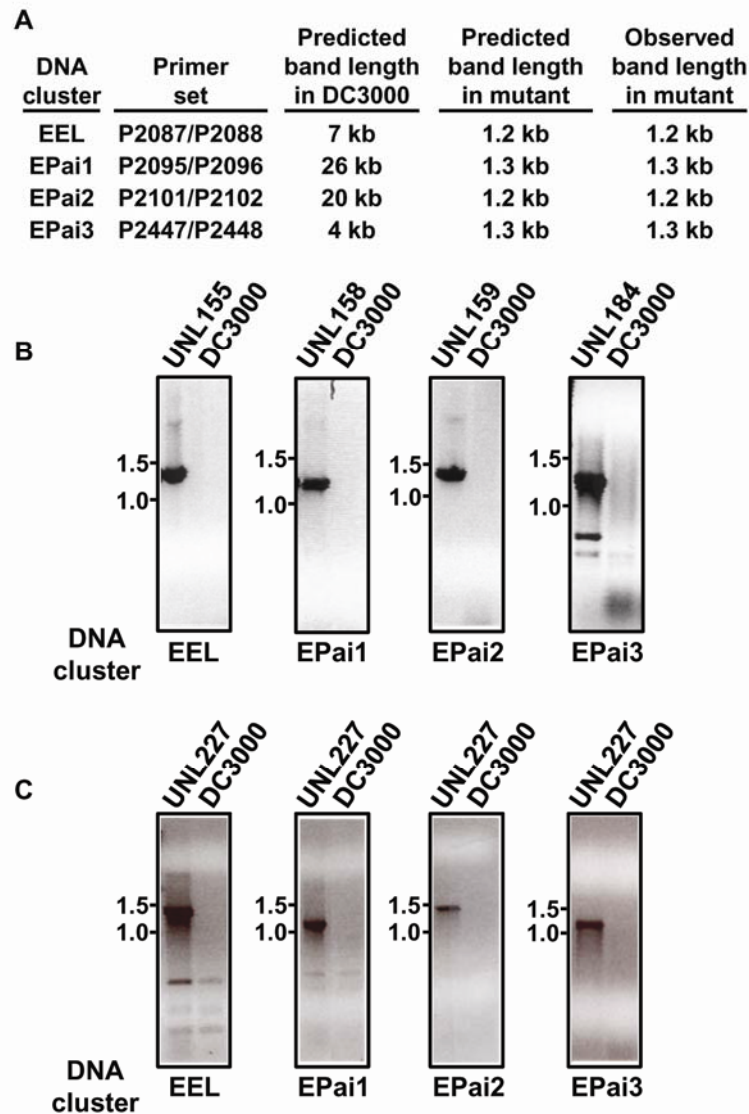

**Supplemental Figure 5.** Confirmation of DC3000 DNA cluster mutants. Colony PCR was done for each of the mutants and compared to wild type bacterial samples to confirm that a T3E-related DNA cluster was deleted from the different bacterial mutants. (A) The DNA cluster names, primer sets used, and expected and observed PCR band lengths are indicated. Primers were made approximately 600 base pairs upstream and downstream of the DNA cluster, which would result in a PCR product of about 1.2 kb if the putative mutant carried the correct mutation. (B) DNA agarose gels of PCR reactions from the single T3E-related DNA clusters. (C) DNA agarose gels of PCR reactions from the poly DNA cluster mutant UNL227. In DC3000 the DNA

clusters were too big to be amplified in the PCR conditions used and resulted in the absence of bands of the predicted length.

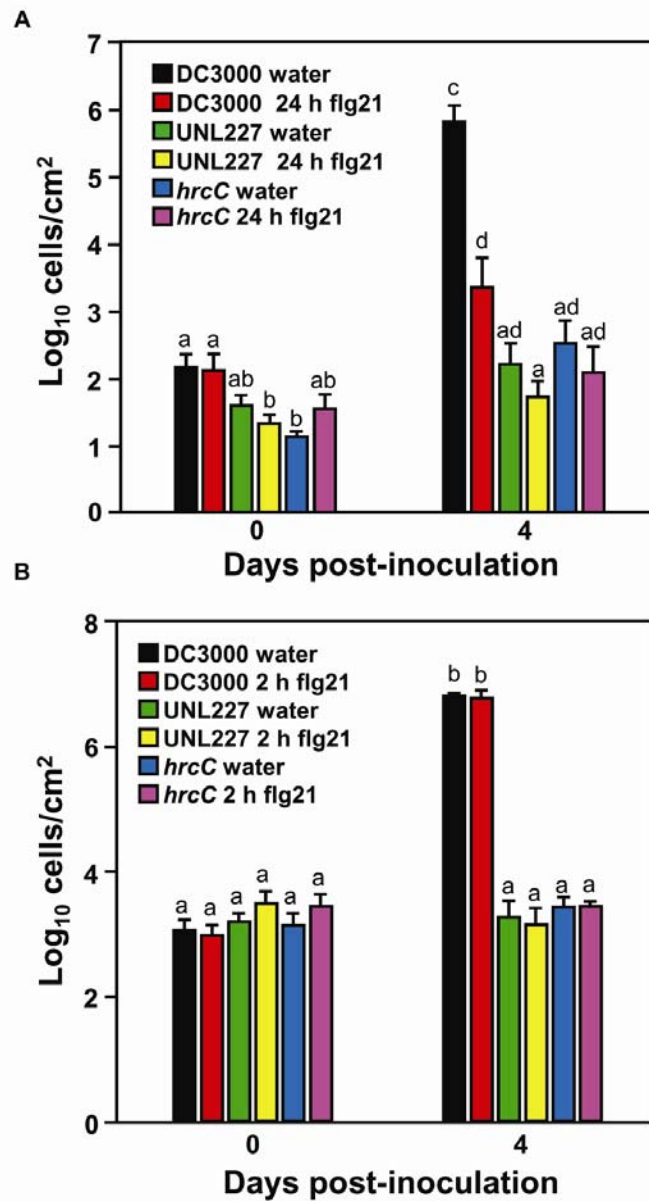

**Supplemental Figure 6.** The induction of PTI by flg21 at 24 h but not 2 h before inoculation with DC3000 inhibits bacterial growth in *A. thaliana*. *A. thaliana* Col-0 plants were infiltrated with 1 $\mu$ M flg21 or a water control at 24 h (A) or 2 h (B) prior to spray-inoculation with  $2 \times 10^8$  cells/ml of DC3000, UNL227 or *hrcC*. Bacteria were enumerated at 0 and 4 d post-inoculation. Letters a-d are statistically different ( $p < 0.05$ ) and standard error bars are shown. These experiments were repeated at least three times with similar results.

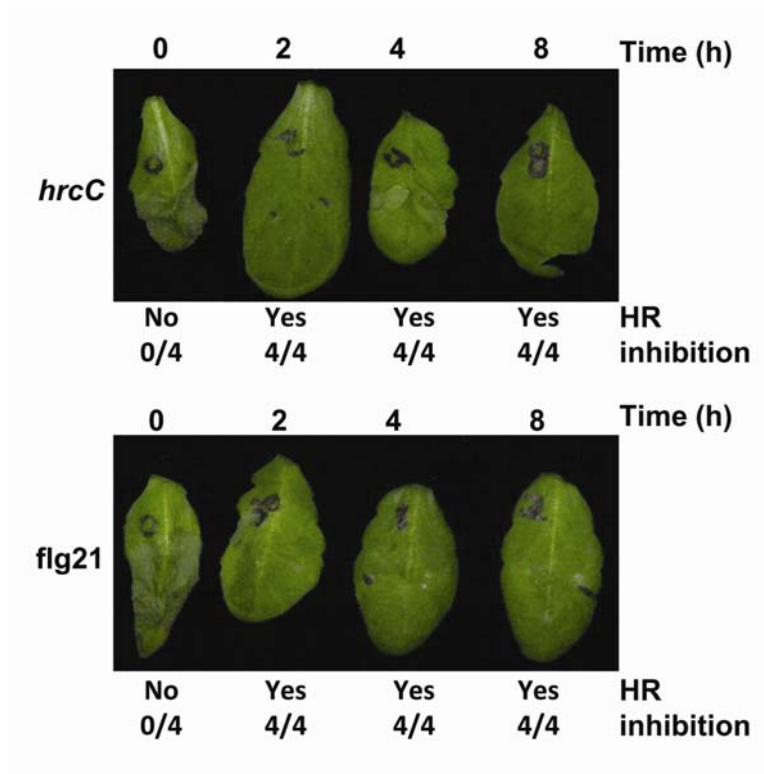

**Supplemental Figure 7.** PTI-induction inhibits AvrRpm1 induced HR in *A. thaliana* by *hrcC* and flg21 PTI-inducers. Infiltration of the leaves of *A. thaliana* with  $1 \times 10^7$  cells/ml of *P. fluorescens*(pLN1965 + *pavrRpm1*) was unable to cause an HR in PTI-induced leaves pretreated with the *hrcC* mutant or flg21. With the exception of the zero time point, the HRs were inhibited in leaves at the remaining time points. The fraction below each leaf indicates the number of times that the HR was inhibited over the total number of times the assay was performed. Photos were taken after 48 hours after *P. fluorescens*(pLN1965 + *pavrRpm1*) infiltration.



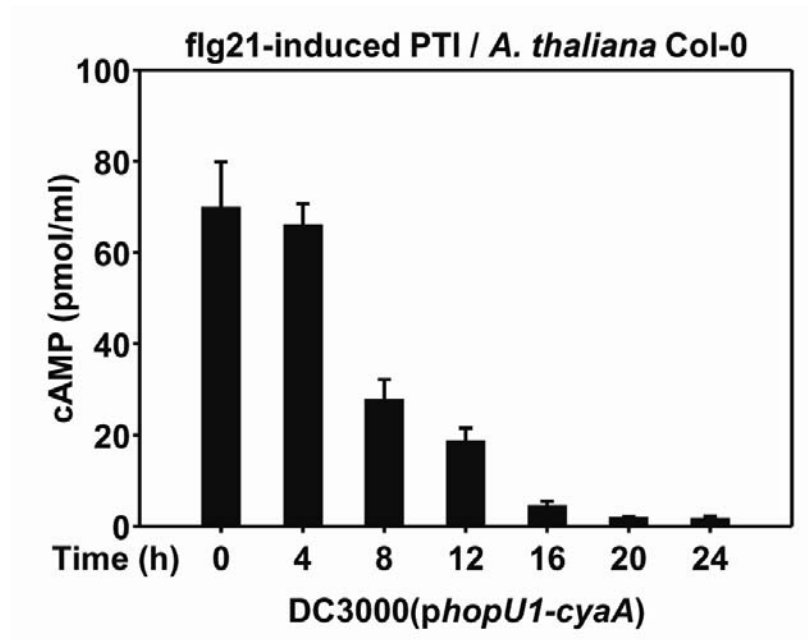

**Supplemental Figure 8.** Time course of the restriction of HopU1-CyaA injection into PTI-induced *A. thaliana* plant cells. PTI was induced with 1  $\mu$ M flg21 and at the indicated times DC3000(*phopU1-cyaA*) at a cell density of  $3 \times 10^8$  cells/ml was infiltrated into the pretreated leaf regions. After 16 h cAMP levels were determined. This experiment was repeated three times with similar results.

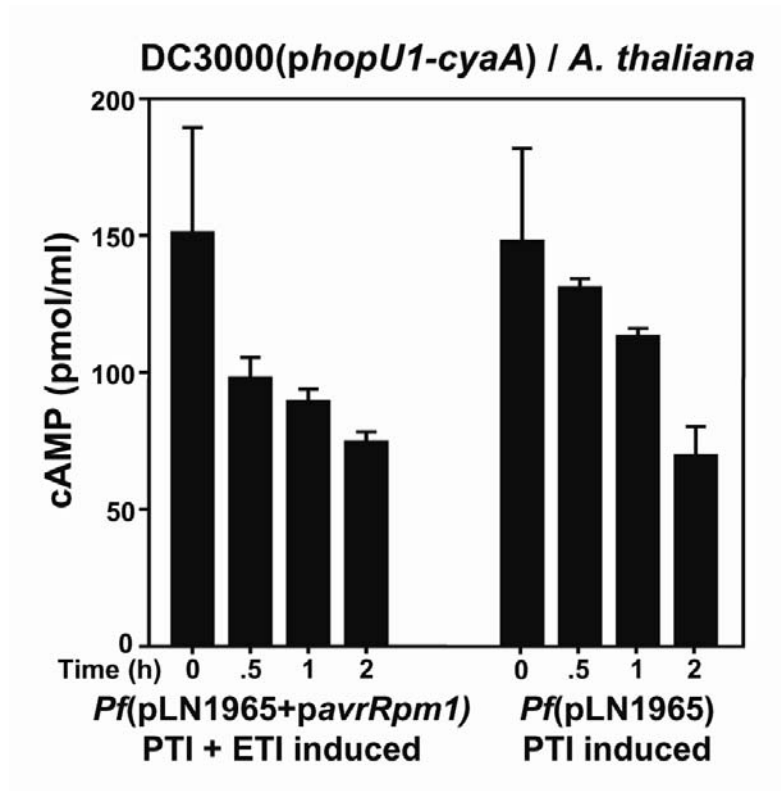

**Supplemental Figure 9.** PTI- and ETI-induced *A. thaliana* plants appear to restrict T3E injection more quickly than when PTI only is induced in *A. thaliana* plants. *A. thaliana* plants were pretreated with  $3 \times 10^8$  cells/ml *P. fluorescens*(pLN1965), which induces PTI, or *P. fluorescens*(pLN1965 + *pavrRpm1*), which induces PTI and ETI. At the indicated times DC3000(*phopU1-cyaA*) at a cell density of  $3 \times 10^8$  cells/ml was infiltrated into the pretreated leaves and the level of T3E injection was determined by quantifying cAMP in the overlapping infiltration area 16 h later. These experiments were repeated at least three times with similar results.

**Supplemental Table 1. Strains and plasmids used in this study**

| Strain or plasmid                                    | Characteristics                                                                                                                                                                                                                                                          | Reference or source                                       |
|------------------------------------------------------|--------------------------------------------------------------------------------------------------------------------------------------------------------------------------------------------------------------------------------------------------------------------------|-----------------------------------------------------------|
| <i>E. coli</i> DH5 $\alpha$                          | <i>supE44</i> $\Delta$ <i>lacU169</i> ( $\Phi$ 80 <i>lacZ</i> $\Delta$ M15) <i>hsdR17 recA1 endA1 gyrA96 thi-1 relA1</i> , NaI <sup>r</sup>                                                                                                                              | (Hanahan, 1983); Life Technologies, Gaithersburg, MD, USA |
| <i>E. coli</i> DB3.1                                 | <i>F</i> <i>gyrA462 endA1</i> $\Delta$ ( <i>sr1-recA</i> ) <i>mcrB mrr hsdS20</i> ( <i>r<sub>B</sub><sup>-</sup></i> , <i>r<sub>B</sub><sup>-</sup></i> ) <i>supE44 ara-14 galK2 lacY1 proA2 rpsL20</i> (Sm <sup>r</sup> ) <i>xyl-5 <math>\lambda^-</math> leu mtl-1</i> | Invitrogen, Carlsbad, CA, USA                             |
| <i>E. coli</i> HB101                                 | <i>supE44 hsdS20</i> ( <i>r<sub>B</sub><sup>-</sup></i> , <i>m<sub>B</sub><sup>-</sup></i> ) <i>recA13 ara-14 proA2 lacY1 galK2 rpsL20 xyl-5 <math>\Delta</math>leu mtl-1</i>                                                                                            | New England Biolabs, Beverly, MA, USA                     |
| <i>Pseudomonas fluorescens</i> 55                    | NaI <sup>r</sup>                                                                                                                                                                                                                                                         | M. Sasser                                                 |
| <i>Pseudomonas syringae</i> pv. <i>tomato</i> DC3000 | Wild type, Rf <sup>r</sup>                                                                                                                                                                                                                                               | (Cuppels, 1986)                                           |
| DC3000 <i>hrcC</i>                                   | <i>hrcC</i> mutant defective in T3SS, Rf <sup>r</sup> Cm <sup>r</sup>                                                                                                                                                                                                    | (Yuan and He, 1996)                                       |
| <i>Pseudomonas syringae</i> pv. <i>tabaci</i> 11528  | Wild type, NaI <sup>r</sup>                                                                                                                                                                                                                                              | American Type Culture Collection                          |
| UNL155                                               | DC3000 EEL mutant lacking T3E <i>hopB1</i> , Rf <sup>r</sup>                                                                                                                                                                                                             | This work                                                 |
| UNL158                                               | DC3000 EPai1 mutant lacking T3E genes <i>hopD1</i> , <i>hopQ1-1</i> , and <i>hopR1</i> , Rf <sup>r</sup>                                                                                                                                                                 | This work                                                 |
| UNL159                                               | DC3000 EPai2 mutant lacking T3E genes <i>hopAA1-2</i> , <i>hopV1/shcV</i> , <i>hopAO1</i> , <i>hopG1</i> , and <i>hopQ1-2</i> , Rf <sup>r</sup>                                                                                                                          | This work                                                 |
| UNL184                                               | DC3000 EPai3 mutant lacking T3E genes <i>hopF2/shcF</i> and <i>hopU1</i> , Rf <sup>r</sup>                                                                                                                                                                               | This work                                                 |
| UNL227                                               | DC3000 EPai1, EPai2, EPai3, EEL mutant, Rf <sup>r</sup>                                                                                                                                                                                                                  | This work                                                 |
| pBH474                                               | Suc <sup>s</sup> derivative of pTH474                                                                                                                                                                                                                                    | (House et al., 2004)                                      |
| pHIR11                                               | Cosmid pLAFR3 derivative carrying T3SS DNA from <i>P. syringae</i> pv. <i>syringae</i> 61, Tc <sup>r</sup>                                                                                                                                                               | (Huang et al., 1988)                                      |
| pENTR/D-TOPO                                         | Gateway system entry vector, Km <sup>r</sup>                                                                                                                                                                                                                             | Invitrogen, Carlsbad, CA, U.S.A.                          |
| pLN525                                               | pPZP212 derivative carrying <i>hopF2</i> , Km <sup>r</sup>                                                                                                                                                                                                               | This work                                                 |
| pLN953                                               | pPZP212 derivative carrying <i>hopT1-2</i> , Km <sup>r</sup>                                                                                                                                                                                                             | This work                                                 |
| pLN956                                               | pPZP212 derivative carrying <i>avrE1</i> , Km <sup>r</sup>                                                                                                                                                                                                               | This work                                                 |
| pLN958                                               | pPZP212 derivative carrying <i>hopAA1-2</i> , Km <sup>r</sup>                                                                                                                                                                                                            | This work                                                 |
| pLN1965                                              | pHIR11 derivative containing a deletion of <i>shcA/hopA1</i> operon replaced by a sp resistant cassette, Tc <sup>r</sup> Sp <sup>r</sup>                                                                                                                                 | (Guo et al., 2009)                                        |
| pLN2193                                              | pML123 derivative gateway destination vector containing a CyaA tag for C-terminal fusions, Gm <sup>r</sup>                                                                                                                                                               | (Fu et al., 2006)                                         |
| pLN2194                                              | pMK2017 derivative carrying 2.5 kb sequence US of EPai1, Tc <sup>r</sup> , Sp <sup>r</sup>                                                                                                                                                                               | This work                                                 |
| pLN2195                                              | pMK2017 derivative carrying 2.5 kb sequence US of EPai2, Tc <sup>r</sup> , Sp <sup>r</sup>                                                                                                                                                                               | This work                                                 |
| pLN2204                                              | pMK2016 derivative carrying 2.0 kb sequence DS of EPai1, Sp <sup>r</sup>                                                                                                                                                                                                 | This work                                                 |
| pLN2205                                              | pMK2016 derivative carrying 2.0 kb sequence DS of EPai2, Sp <sup>r</sup>                                                                                                                                                                                                 | This work                                                 |
| pLN2250                                              | pLN2193 derivative carrying <i>avrPtoB</i> , Gm <sup>r</sup>                                                                                                                                                                                                             | This work                                                 |
| pLN2254                                              | pLN2193 derivative carrying <i>hopU1</i> , Gm <sup>r</sup>                                                                                                                                                                                                               | This work                                                 |
| pLN2616                                              | pMK2017 derivative carrying 1.5 kb sequence US of EPai3, Tc <sup>r</sup> , Sp <sup>r</sup>                                                                                                                                                                               | This work                                                 |
| pLN2617                                              | pMK2016 derivative carrying 2.0 kb sequence DS of EPai3, Sp <sup>r</sup>                                                                                                                                                                                                 | This work                                                 |
| pLN2637                                              | pML123 derivative carrying <i>avrRpt2-ha</i> , Gm <sup>r</sup>                                                                                                                                                                                                           | This work                                                 |
| pLN2665                                              | pMK2017 derivative carrying 2.4 kb sequence US of EEL, Tc <sup>r</sup> , Sp <sup>r</sup>                                                                                                                                                                                 | This work                                                 |
| pLN2666                                              | pMK2016 derivative carrying 2.5 kb sequence DS of EEL, Sp <sup>r</sup>                                                                                                                                                                                                   | This work                                                 |
| pMK2016                                              | Sp <sup>r</sup> St <sup>r</sup> <i>oriV oriT</i> <sub>ColE1</sub> with FRT cassette from pMK2014                                                                                                                                                                         | (House et al., 2004)                                      |

|                         |                                                                                                    |                             |
|-------------------------|----------------------------------------------------------------------------------------------------|-----------------------------|
| pMK2017                 | Tc <sup>r</sup> <i>oriV<sub>R6K</sub></i> <i>oriT<sub>RP4</sub></i> with FRT cassette from pMK2015 | (House et al., 2004)        |
| pRK2013                 | Km <sup>r</sup> mobilization helper plasmid                                                        |                             |
| pRK2073                 | Sp <sup>r</sup> mobilization helper plasmid                                                        |                             |
| pVSP61:: <i>avrRpm1</i> | pVSP61 derivative containing <i>avrRpm1</i> , Km <sup>r</sup>                                      | (Mackey et al., 2002)       |
| pPZP212                 | <i>Agrobacterium tumefaciens</i> binary vector, Km <sup>r</sup>                                    | (Hajdukiewicz et al., 1994) |

---

**Supplemental Table 2. Primers used in this study**

| Primer | Sequence                                                  | Use <sup>a</sup> |
|--------|-----------------------------------------------------------|------------------|
| P1789  | 5'-GAACTTCAAGATCCCCTGATTCCCTT-3'                          | pMK2016 insert   |
| P1790  | 5'-GAGCGCTTTTGAAGCTGATGTGC-3'                             | pMK2017 insert   |
| P2087  | 5'-GCACGTTGGGTACGCTGCAAG-3'                               | confirm EEL      |
| P2088  | 5'-CGCCGCCGCCATCGATC-3'                                   | confirm EEL      |
| P2091  | 5'-GGGGACAAGTTTGTACAAAAAAGCAGGCTGCGCTTCTCCCTGGC-3'        | pLN2194          |
| P2092  | 5'-GGGGACCACTTTGTACAAGAAAGCTGGGTGCCTGCGGGCTGGATG-3'       | pLN2194          |
| P2093  | 5'-GGGGACAAGTTTGTACAAAAAAGCAGGCTCTCCTGGGCATTCTTCAGACG-3'  | pLN2204          |
| P2094  | 5'-GGGGACCACTTTGTACAAGAAAGCTGGGTGGCGTTGACACCTACGTCATAC-3' | pLN2204          |
| P2095  | 5'-CCGTCCGCAGTTCAGGCG-3'                                  | confirm EPai1    |
| P2096  | 5'-CCGGCAAGCGGGTATGC-3'                                   | confirm EPai1    |
| P2097  | 5'-GGGGACAAGTTTGTACAAAAAAGCAGGCTGCTCTATTATCGCAGCCCCCTG-3' | pLN2195          |
| P2098  | 5'-GGGGACCACTTTGTACAAGAAAGCTGGGTGCTACTCAGCGTATGGGGCGAG-3' | pLN2195          |
| P2099  | 5'-GGGGACAAGTTTGTACAAAAAAGCAGGCTGACAACCCCCAAGACAAACTCC-3' | pLN2205          |
| P2100  | 5'-GGGGACCACTTTGTACAAGAAAGCTGGGTGCAACTGGGGTTTGCGGAGC-3'   | pLN2205          |
| P2101  | 5'-GAAGAGTTTTCCAGGGGCTGC-3'                               | confirm EPai2    |
| P2102  | 5'-CGGTGAAACTGCTTCCCCTATTCC-3'                            | confirm EPai2    |
| P2404  | 5'-CACCGTTTTTTCATAATGCATCTCCTCAT-3'                       | pLN2617          |
| P2405  | 5'-CCCTCCTACCTGGCATCGAAATG-3'                             | pLN2617          |
| P2406  | 5'-CACCGTCATTCGTTCCAGGATTCATCAG-3'                        | pLN2616          |
| P2407  | 5'-CAGATTTGAGTCCATGAAGGAGGCC-3'                           | pLN2616          |
| P2443  | 5'-CACCTCAATGGTGGTGCCCCGAG-3'                             | pLN2665          |
| P2444  | 5'-GTATAAAAAGCAGGAAAAACTCGTTC-3'                          | pLN2665          |
| P2445  | 5'-CACCCGATCTCGATCATTTTTTCTGG-3'                          | pLN2666          |
| P2446  | 5'-CGCGGAGATTCAATCATG-3'                                  | pLN2666          |
| P2447  | 5'-GAACAAGGAATGGGGCGAGC-3'                                | confirm EPai3    |
| P2448  | 5'-GGCGATGTTGCTGACGACCAAATAC-3'                           | confirm EPai3    |

<sup>a</sup>Primers were used to make a construct, confirm a deletion, or confirm a sequence insertion.

## LITERATURE CITED

- Cuppels DA** (1986) Generation and characterization of Tn5 insertion mutations in *Pseudomonas syringae* pv. *tomato*. Appl. Environ. Microbiol. **51**: 323-327
- Fu ZQ, Guo M, Alfano JR** (2006) *Pseudomonas syringae* HrpJ is a type III secreted protein that is required for plant pathogenesis, injection of effectors, and secretion of the HrpZ1 harpin. J. Bacteriol. **188**: 6060-6069
- Guo M, Tian F, Wamboldt Y, Alfano JR** (2009) The majority of the type III effector inventory of *Pseudomonas syringae* pv. *tomato* DC3000 can suppress plant immunity. Mol. Plant Microbe Interact. **22**: 1069-1080
- Hajdukiewicz P, Svab Z, Maliga P** (1994) The small, versatile pPZP family of *Agrobacterium* binary vectors for plant transformation. Plant Mol. Biol. **25**: 989-994
- Hanahan D** (1983) Studies on transformation of *Escherichia coli* with plasmids. J. Mol. Biol. **166**: 557- 580
- House BL, Mortimer MW, Kahn ML** (2004) New Recombination Methods for *Sinorhizobium meliloti* Genetics. Appl. Environ. Microbiol. **70**: 2806-2815
- Huang H-C, Schuurink R, Denny TP, Atkinson MM, Baker CJ, Yucel I, Hutcheson SW, Collmer A** (1988) Molecular cloning of a *Pseudomonas syringae* pv. *syringae* gene cluster that enables *Pseudomonas fluorescens* to elicit the hypersensitive response in tobacco plants. J. Bacteriol. **170**: 4748-4756
- Mackey D, Holt BF, III, Wiig A, Dangl JL** (2002) RIN4 interacts with *Pseudomonas syringae* type III effector molecules and is required for RPM1-mediated resistance in *Arabidopsis*. Cell **108**: 743-754
- Yuan J, He SY** (1996) The *Pseudomonas syringae* Hrp regulation and secretion system controls the production and secretion of multiple extracellular proteins. J. Bacteriol. **178**: 6399-6402
